# Supplementary material for: Molecular Diversity and Combining Ability in Newly Developed Maize Inbred Lines under Low-Nitrogen Conditions
Source: MDPI journal article supplement (doi:10.3390/life14050641), 2024-05-17
Supplement: s1 [file s1]

**Table S1.** Code, name, pedigree and source of the seven maize inbred lines

| Parent code | Pedigree                                       | Source        |
|-------------|------------------------------------------------|---------------|
| I.L. 1      | Locally developed                              | Egypt         |
| I.L. 2      | Locally developed                              | Egypt         |
| I.L. 3      | Locally developed                              | Egypt         |
| I.L. 4      | Locally developed                              | Egypt         |
| I.L. 5      | [EMSR]#B#bF101sr-2-1-sr-3-2-4-b-b              | CIMMYT-Mexico |
| I.L. 6      | [EV7992#/EVPO44-SRBC3]#bF37sr-2-3-sr-3-5-2-b-b | CIMMYT-Mexico |
| I.L. 7      | [EV7992#/EVPO44-SRBC3]#bF37sr-2-3-sr-2-4-3-b-b | CIMMYT-Mexico |

**Table S2.** Some physical and chemical soil characteristics of the experimental sites during 2022 and 2023 growing seasons.

| Properties                                      | 2022   | 2023   |
|-------------------------------------------------|--------|--------|
| Soil texture                                    | Clay   | Clay   |
| Sand (%)                                        | 14.90  | 13.20  |
| Silt (%)                                        | 32.50  | 33.20  |
| Clay (%)                                        | 52.60  | 53.60  |
| pH (1: 2.5 water suspension)                    | 8.31   | 8.11   |
| EC (dSm <sup>-1</sup> )                         | 3.55   | 3.65   |
| Organic matter (%)                              | 1.85   | 1.76   |
| Available Nitrogen (N) (mg kg <sup>-1</sup> )   | 38.56  | 36.75  |
| Available phosphorus (P) (mg kg <sup>-1</sup> ) | 9.42   | 10.66  |
| Available potassium (K) (mg kg <sup>-1</sup> )  | 260.63 | 245.80 |

**Table S3.** List of SSR primers and their sequences used in the present study.

| Marker    | Forward primer            | Reverse primer           |
|-----------|---------------------------|--------------------------|
| phi308707 | GCAACAAGATCCAGCCGAT       | GTCGCCCTCATATGACCTTC     |
| phi96100  | AGGAGGACCCCAACTCCTG       | TTGCACGAGCCATCGTAT       |
| phi453121 | ACCTTGCCTGTCCTTCTTTCT     | CAAGCAAGACTTTTGATCAGCC   |
| umc2038   | ACAGAAACCAATGCATGTGATGAG  | ACAGAAACCAATGCATGTGATGAG |
| phi024    | ACTGTTCCACCAAACCAAGCCGAGA | AGTAGGGTTGGGGATCTCCTCC   |
| Umc1014   | GAAAGTCGATCGAGAGACCCTG    | CCCTCTCTTCACCCCTTCCTT    |
| umc2332   | GTCGGAGAAGGAGCTACTGAGCTA  | CACAGGTACGTCTGGATGCTGT   |
| phi015    | GCAACGTACCGTACCTTTCCGA    | ACGCTGCATTCAATTACCGGGAAG |
| umc1033   | CTTCTTCGTAAAGGCATTTTGTGC  | GTGCGGGATTCTTAGTTTGC     |
| phi108411 | CGTCCCTTGGATTTTCGAC       | CGTACGGGACCTGTCAACAA     |
| phi301654 | GAATGCATGCTTTTCAAGGAC     | CGCACAGAGAGCAGAACG       |

**Table S4:** Mean squares from ordinary analysis and combining ability for the studied traits under low and recommended nitrogen levels.

| SOV         | df | Days to silking     |               | Plant height (cm)      |               | Ear height (cm)        |               | Ear length (cm)    |               |
|-------------|----|---------------------|---------------|------------------------|---------------|------------------------|---------------|--------------------|---------------|
|             |    | Low N               | Recommended N | Low N                  | Recommended N | Low N                  | Recommended N | Low N              | Recommended N |
| Hybrids (H) | 20 | 12.34**             | 16.68**       | 996.17**               | 1009.09**     | 642.67**               | 847.84**      | 12.34**            | 16.68**       |
| GCA         | 6  | 6.68**              | 7.78**        | 288.32**               | 426.29**      | 221.22**               | 388.12**      | 6.68**             | 7.78**        |
| SCA         | 14 | 3.02**              | 4.61**        | 350.80**               | 297.82**      | 211.23**               | 237.40**      | 3.02**             | 4.61**        |
| Error       | 40 | 0.64                | 0.86          | 190.74                 | 122.04        | 90.57                  | 91.13         | 0.64               | 0.86          |
| GCA/SCA     |    | 2.21                | 1.69          | 0.82                   | 1.43          | 1.05                   | 1.63          | 2.21               | 1.69          |
| SOV         | df | No. of rows per ear |               | No. of kernels per row |               | 1000-kernel weight (g) |               | Grain yield (t/ha) |               |
|             |    | Low N               | Recommended N | Low N                  | Recommended N | Low N                  | Recommended N | Low N              | Recommended N |
| Hybrids (H) | 20 | 4.32**              | 3.85**        | 85.98**                | 63.13**       | 3353.56**              | 2720.75**     | 8.28**             | 6.47**        |
| GCA         | 6  | 2.41**              | 1.83**        | 55.88**                | 35.16**       | 2138.04**              | 1235.53**     | 6.97**             | 5.26**        |
| SCA         | 14 | 1.02**              | 1.05**        | 17.00**                | 15.00**       | 680.63**               | 766.08**      | 0.96**             | 0.83**        |
| Error       | 40 | 0.71                | 0.60          | 17.72                  | 10.54         | 173.79                 | 124.44        | 0.14               | 0.16          |
| GCA/SCA     |    | 2.35                | 1.74          | 3.29                   | 2.34          | 3.14                   | 1.61          | 7.28               | 6.36          |

\*\* signify *p*-values less 0.01
